# Supplementary material for: Metabolic Responses of the Microalga Neochloris oleoabundans to Extracellular Self- and Nonself-DNA
Source: MDPI journal article supplement (doi:10.3390/ijms241814172), 2023-09-16

Supplementary Materials:

Table S1. Parameters of the phytohormone’s validation.

| Component    | RT (min)  | Scan | Transition SRM  | CE (eV) | Slope (b) | Interception (a) | R <sup>2</sup> | Sx/y     | LOD (pM) | LOQ (pM) |
|--------------|-----------|------|-----------------|---------|-----------|------------------|----------------|----------|----------|----------|
| <i>tZ/cZ</i> | 7.55/8.90 | +    | 220.11 → 202.03 | 35      | 5880.7    | 2409.7           | 0.9998         | 17108.27 | 8.73     | 29.09    |
| SA           | 12.39     | -    | 137.02 → 93.03  | 35      | 81.0      | 6011.9           | 0.9998         | 364.52   | 13.50    | 44.99    |
| GA3          | 14.39     | -    | 345.13 → 239.22 | 35      | 8640.1    | 14753.4          | 0.9999         | 3612.11  | 1.25     | 4.18     |
| IAA          | 14.41     | +    | 176.07 → 130.06 | 35      | 866.2     | -6126.5          | 0.9999         | 2271.45  | 7.87     | 26.22    |
| IsoA         | 15.26     | +    | 204.12 → 136.06 | 35      | 3233.8    | 5317.4           | 0.9999         | 4738.97  | 4.40     | 14.65    |
| BAP          | 15.41     | +    | 226.10 → 91.05  | 35      | 236.4     | 73687.2          | 0.9999         | 1989.26  | 2.24     | 7.47     |
| ABA          | 17.27     | -    | 263.12 → 219.14 | 35      | 236.4     | -510.6           | 0.9941         | 3282.18  | 41.64    | 138.79   |
| MeJA         | 20.33     | +    | 225.14 → 207.05 | 35      | 18185.3   | 503680.5         | 0.9998         | 53446.24 | 8.82     | 29.39    |

Retention time in min, (RT); Selected reaction monitoring, (SRM); Electrical current, (CE) in electrovolts (eV); Slope and intercept of the linear regression, (**b** and **a**) respectively; Standard deviation of the response, (Sx/y); Limit of detection (LOD); Limit of quantification (LOQ)

Figure S1

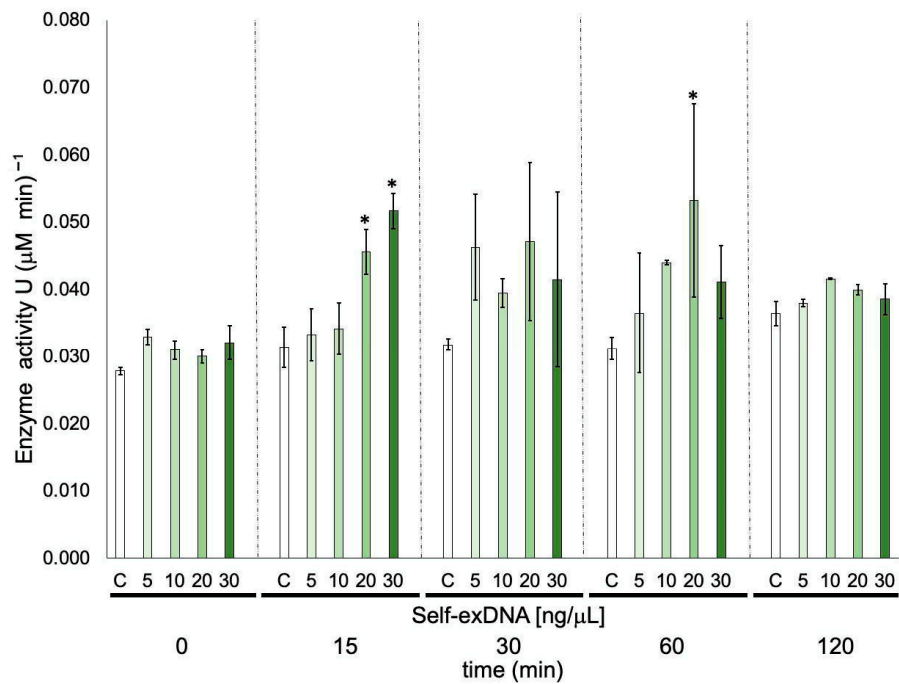

**Figure S1.** Dose-response curve of the peroxidase enzyme activity of *Neochloris oleoabundans*, after application of self-exDNA at different concentrations and times. The unit of enzyme activity (U) was defined as the catalytic activity responsible for the transformation of one  $\mu\text{mol}$  substrate per minute under optimal enzyme conditions. (c), control without self-exDNA. Data represent mean  $\pm$  standard deviation (SD, n = 3). Asterisks indicate statistically significant differences (\* =  $p < 0.05$ ; \*\* =  $p < 0.01$ ; \*\*\* =  $p < 0.001$ ).

Figure S2  
Standard curves of phytohormones

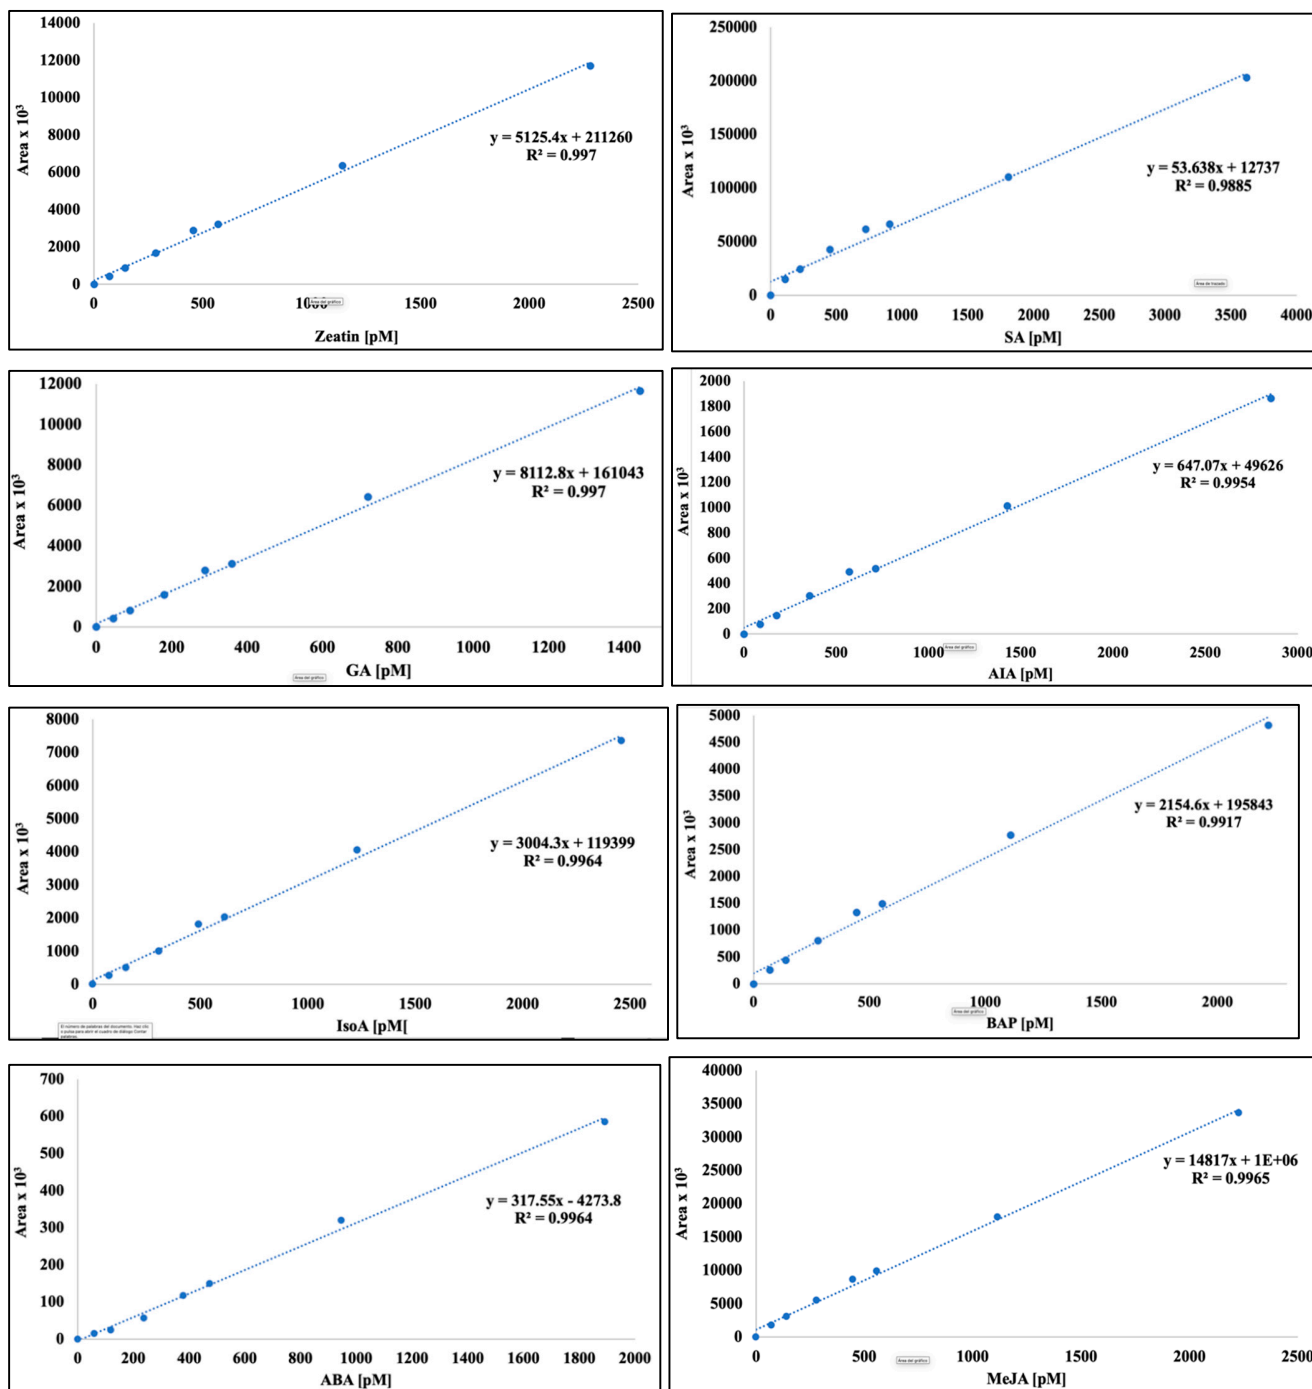

Supplement: s1 [file s1]
